# Supplementary material for: Evidence-based comparative severity assessment in young and adult mice
Source: PubMed Central journal article supplement (PMC10588901; doi:10.1371/journal.pone.0285429), 2023-10-20
Supplement: pone.0285429.s003.pdf [file pone.0285429.s003.pdf]

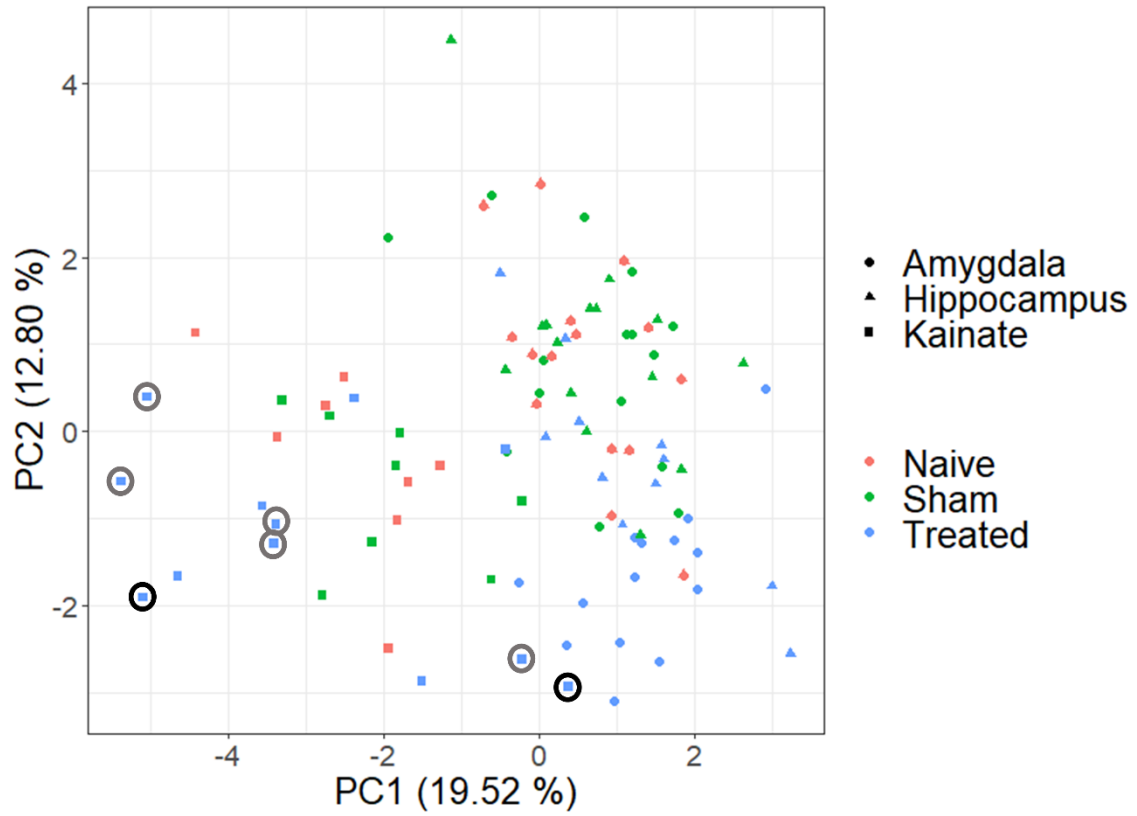

**Fig S2. Results from one PCA run across the three adult epilepsy models.** Animals from the intrahippocampal kainate model are highlighted as follows: individual data from animals with only one seizure are circled in grey. In comparison, data from animals that showed more than one seizure are circled in black.
