# Supplementary material for: Evidence-based comparative severity assessment in young and adult mice
Source: PubMed Central journal article supplement (PMC10588901; doi:10.1371/journal.pone.0285429), 2023-10-20
Supplement: pone.0285429.s005.pdf [file pone.0285429.s005.pdf]

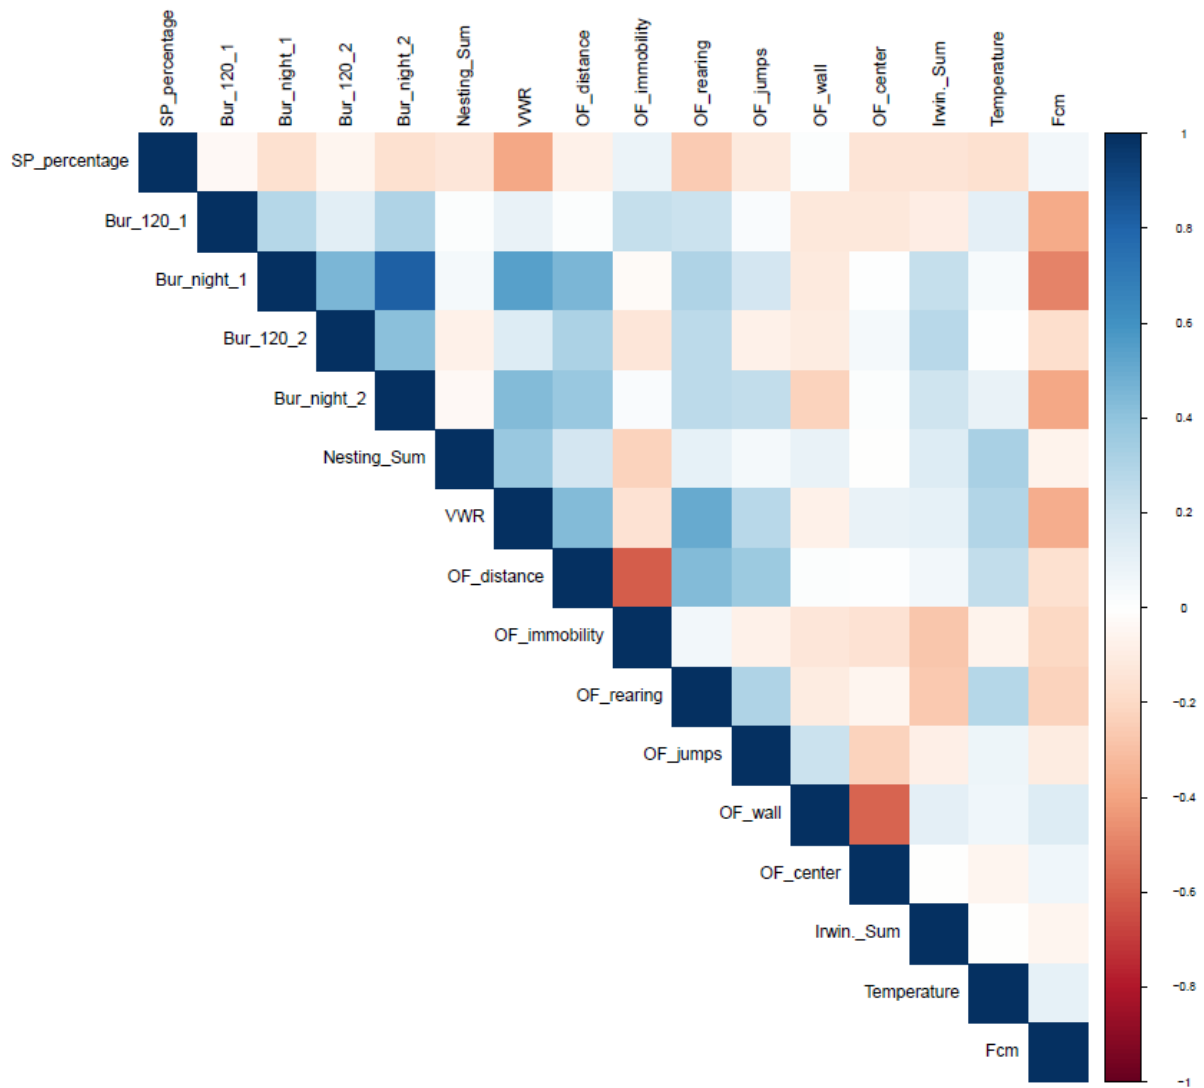

**Fig S4. Correlation analysis (Spearman).** C57BL/6J model: adolescence (P25, P36, P50).
