# Supplementary material for: Evidence-based comparative severity assessment in young and adult mice
Source: PubMed Central journal article supplement (PMC10588901; doi:10.1371/journal.pone.0285429), 2023-10-20
Supplement: pone.0285429.s006.pdf [file pone.0285429.s006.pdf]

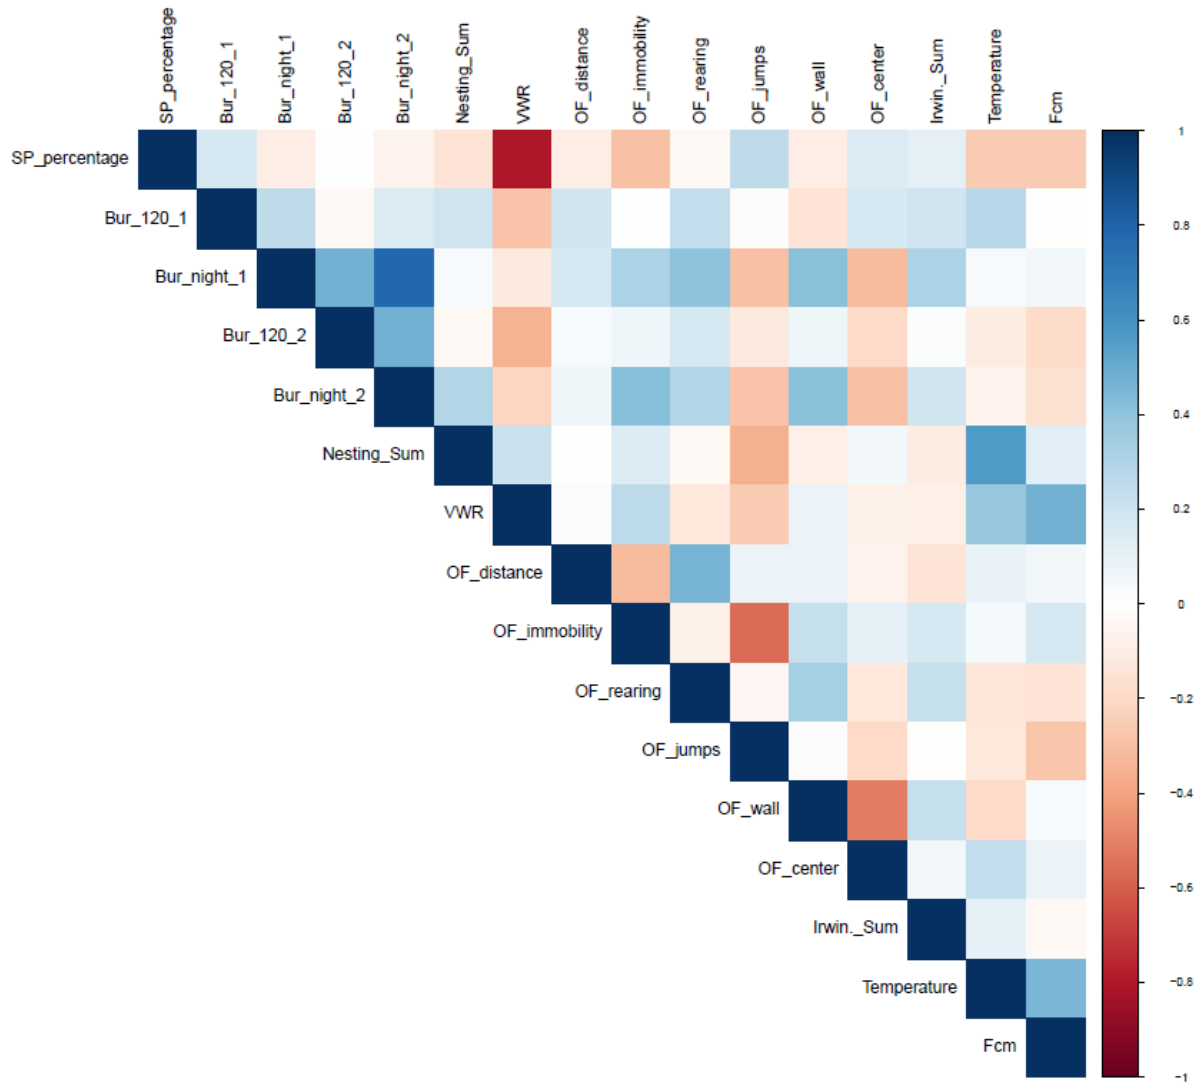

**Fig S5: Correlation analysis (Spearman).** C57BL/6J model: mature adult (P120).
