# Supplementary material for: Evidence-based comparative severity assessment in young and adult mice
Source: PubMed Central journal article supplement (PMC10588901; doi:10.1371/journal.pone.0285429), 2023-10-20
Supplement: pone.0285429.s009.pdf [file pone.0285429.s009.pdf]

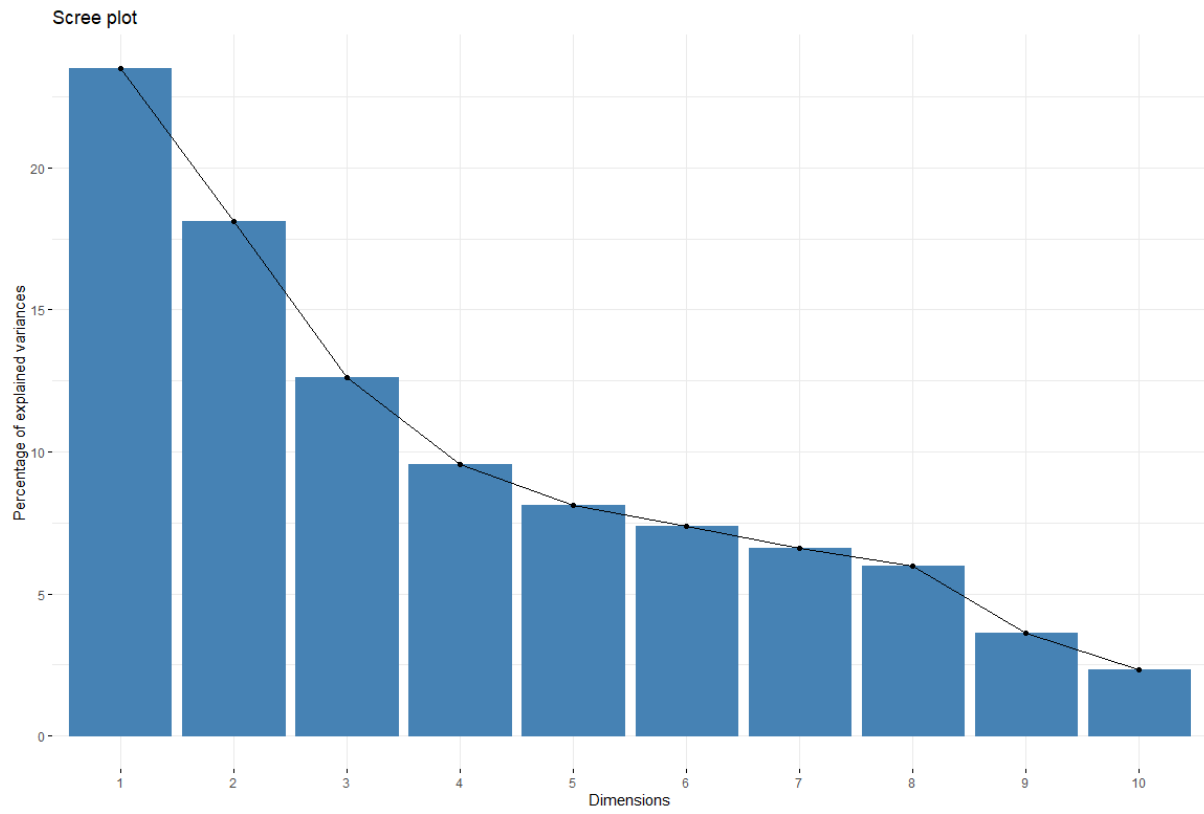

**Fig S8. Scree plot.** Genetic models: early adolescence.
