# Supplementary material for: Evidence-based comparative severity assessment in young and adult mice
Source: PubMed Central journal article supplement (PMC10588901; doi:10.1371/journal.pone.0285429), 2023-10-20
Supplement: pone.0285429.s012.pdf [file pone.0285429.s012.pdf]

| Parameter                              | Test                                     | Meaning                                                                                                                                                                               |
|----------------------------------------|------------------------------------------|---------------------------------------------------------------------------------------------------------------------------------------------------------------------------------------|
| Clinical_score                         | Clinical evaluation                      | Clinical assessment following the Directive 2010/63/EU. The clinical condition of the mice was assessed in addition to the set of behavioral and biochemical parameters.              |
| Nesting                                | Nest building                            | Nest building activity on the day of the 10 <sup>th</sup> generalized seizure (kindling model); with spontaneous seizure activity (week 11 post SE. post SE-models)                   |
| Bur_120/Bur_night                      | Burrowing                                | Burrowing behavior in the phase of generalized seizures. The displaced gravel was calculated in Gramm                                                                                 |
| Social_Int_active<br>Social_Int_passiv | Social interaction<br>Social interaction | The time spent in social interaction was recorded in seconds.                                                                                                                         |
| SP_percentage                          | Saccharin Preference                     | Saccharin preference was tested on 2 days compared to water. Then, the total consumed amount was calculated, and the percentage of saccharin intake was shown in percentage.          |
| OF_distance<br>OF_rearing              | Open Field<br>Open Field                 | Open Field distance moved total in centimeters.<br>Amount of rearing in the Open Field. Rearing was defined as vertical activity with the animal rising more than 45%                 |
| OF_jumps                               | Open Field                               | Amount of jumps against the wall in the Open Field.                                                                                                                                   |
| OF_immobility                          | Open Field                               | Time in seconds, the animal was immobile in the Open Field.                                                                                                                           |
| OF_center                              | Open Field                               | Time in seconds the animals spent in the center region of the Open Field                                                                                                              |
| OF_wall                                | Open Field                               | Time in seconds the animals spent in the wall region of the Open Field                                                                                                                |
| OF_velocity                            | Open Field                               | The velocity of movement of the mice measured in the Open Field in sec/m.                                                                                                             |
| BWB_WB                                 | Black and White Box                      | Time in seconds the animals spent in the white box. The time the animals spent in the black box was also measured, but is not shown here.                                             |
| BWB_stretching                         | Black and White Box                      | The number of stretching postures of the animal in the Black and White Box. Stretching was defined as the animal looking out of the black into the white box with its body elongated. |
| BWB_LT                                 | Black and White Box                      | Latency to the first entry of the black box from the white box in which the animals were placed.                                                                                      |
| EPM_streching                          | Elevated Plus Maze                       | Number of stretching postures of the animal in the Elevated Plus Maze. Stretching was defined as the animal looking out of one of the closed arms into an open arm.                   |
| EPM_headdip                            | Elevated Plus Maze                       | Number of the times the animal looked down from one of the open arms.                                                                                                                 |
| EPM_closedarms                         | Elevated Plus Maze                       | Time the animal spent in both closed arms of the Elevated Plus Maze.                                                                                                                  |
| EPM_openarms                           | Elevated Plus Maze                       | Time the animal spent in both open arms of the Elevated Plus Maze.                                                                                                                    |
| EPM_open1.3                            | Elevated Plus Maze                       | Time the animal spent in the outer 1/3 of the both open arms.                                                                                                                         |
| Fcm                                    | fecal corticosterone metabolites         | Enzymimmonoassay-based analyses of fecal corticosterone metabolites (ng / 0.05 g feces)                                                                                               |
| Irwin                                  | Irwin test                               | Observer-dependent Irwin score                                                                                                                                                        |
| Temperature                            | NA                                       | Rectal body temperature in °C                                                                                                                                                         |
| Homecage_feeding                       | PhenoTyper assessments                   | Duration in zone ‘feeding’                                                                                                                                                            |
| Homecage_drinking                      | PhenoTyper assessments                   | Duration in zone ‘drinking’                                                                                                                                                           |
| VWR                                    | Voluntary wheel running                  | Total distance moved in the wheel in meter                                                                                                                                            |

**Table S1. Overview of the parameters (abbreviations) used for the correlation analyses.**
