# Supplementary material for: Evidence-based comparative severity assessment in young and adult mice
Source: PubMed Central journal article supplement (PMC10588901; doi:10.1371/journal.pone.0285429), 2023-10-20
Supplement: pone.0285429.s014.pdf [file pone.0285429.s014.pdf]

| <b>Position</b> | <b>Parameter</b>  | <b>Frequency</b> |
|-----------------|-------------------|------------------|
| <b>1</b>        | Bur_120           | 38               |
|                 | BWB_LT            | 2                |
|                 | BWB_streching     | 50               |
|                 | BWB_WB            | 2                |
|                 | Fcm               | 2                |
|                 | Nesting           | 1                |
|                 | OF_center         | 1                |
|                 | OF_distance       | 1                |
|                 | Social_Int_active | 2                |
|                 | SP_percentage     | 1                |
| <b>2</b>        | Bur_120           | 17               |
|                 | BWB_LT            | 2                |
|                 | BWB_streching     | 28               |
|                 | BWB_WB            | 13               |
|                 | Fcm               | 4                |
|                 | Nesting           | 11               |
|                 | OF_center         | 1                |
|                 | OF_distance       | 2                |
|                 | Social_Int_active | 14               |
|                 | SP_percentage     | 8                |
| <b>3</b>        | Bur_120           | 12               |
|                 | BWB_LT            | 1                |
|                 | BWB_streching     | 15               |
|                 | BWB_WB            | 26               |
|                 | Fcm               | 7                |
|                 | Nesting           | 11               |
|                 | OF_center         | 3                |
|                 | OF_distance       | 4                |
|                 | Social_Int_active | 16               |
|                 | SP_percentage     | 5                |

**Table S3. Top 30 parameters after 100 PCA runs of the training set in the three adult epilepsy models.**
