# Supplementary material for: Evidence-based comparative severity assessment in young and adult mice
Source: PubMed Central journal article supplement (PMC10588901; doi:10.1371/journal.pone.0285429), 2023-10-20
Supplement: pone.0285429.s015.pdf [file pone.0285429.s015.pdf]

| Group   | Cluster | Amygdala |       | Hippocampus |       | Kainate |       |
|---------|---------|----------|-------|-------------|-------|---------|-------|
|         |         | n        | %     | n           | %     | n       | %     |
| Naïve   | 6       | 37       | 2.57  | 37          | 2.57  | 25      | 3.90  |
|         | 5       | 118      | 8.21  | 118         | 8.21  | 283     | 44.15 |
|         | 4       | 201      | 13.98 | 201         | 13.98 | 165     | 25.74 |
|         | 3       | 371      | 25.80 | 371         | 25.80 | 80      | 12.48 |
|         | 2       | 511      | 35.54 | 511         | 35.54 | 57      | 8.89  |
|         | 1       | 200      | 13.91 | 200         | 13.91 | 31      | 4.84  |
| Sham    | 6       | 21       | 1.79  | 26          | 2.15  | 20      | 3.10  |
|         | 5       | 44       | 3.74  | 59          | 4.88  | 202     | 31.32 |
|         | 4       | 188      | 15.99 | 186         | 15.38 | 211     | 32.71 |
|         | 3       | 311      | 26.45 | 305         | 25.23 | 120     | 18.60 |
|         | 2       | 316      | 26.87 | 388         | 32.09 | 69      | 10.70 |
|         | 1       | 296      | 25.17 | 245         | 20.26 | 23      | 3.57  |
| Treated | 6       | 49       | 4.43  | 137         | 15.64 | 361     | 37.53 |
|         | 5       | 211      | 19.08 | 290         | 33.11 | 189     | 19.65 |
|         | 4       | 469      | 42.41 | 221         | 25.23 | 174     | 18.09 |
|         | 3       | 238      | 21.52 | 124         | 14.16 | 122     | 12.68 |
|         | 2       | 101      | 9.13  | 62          | 7.08  | 69      | 7.17  |
|         | 1       | 38       | 3.44  | 42          | 4.79  | 47      | 4.89  |

**Table S4. Results from the *k*-means cluster allocation in the three adult epilepsy models.**
