# Supplementary material for: Evidence-based comparative severity assessment in young and adult mice
Source: PubMed Central journal article supplement (PMC10588901; doi:10.1371/journal.pone.0285429), 2023-10-20
Supplement: pone.0285429.s020.pdf [file pone.0285429.s020.pdf]

| Early adolescence |                  |           | Late adolescence |                  |           |  |
|-------------------|------------------|-----------|------------------|------------------|-----------|--|
| Position          | Parameter        | Frequency | Position         | Parameter        | Frequency |  |
| 1                 | Fcm              | 21        | 1                | Bur_night        | 8         |  |
|                   | Heimk_drinking   | 6         |                  | Fcm              | 31        |  |
|                   | Homecage_feeding | 15        |                  | Heimk_drinking   | 2         |  |
|                   | Irwin            | 2         |                  | Irwin            | 42        |  |
|                   | OF_distance      | 1         |                  | OF_jumps         | 3         |  |
|                   | OF_jumps         | 13        |                  | Temp             | 14        |  |
|                   | SP_percentage    | 2         |                  |                  |           |  |
|                   | Temp             | 40        |                  |                  |           |  |
| 2                 | Fcm              | 16        | 2                | Bur_night        | 9         |  |
|                   | Heimk_drinking   | 8         |                  | Fcm              | 44        |  |
|                   | Homecage_feeding | 39        |                  | Heimk_drinking   | 12        |  |
|                   | Irwin            | 1         |                  | Homecage_feeding | 4         |  |
|                   | Nesting_sum      | 2         |                  | Irwin            | 20        |  |
|                   | OF_distance      | 1         |                  | OF_jumps         | 3         |  |
|                   | OF_jumps         | 5         |                  | Temp             | 8         |  |
|                   | Temp             | 28        |                  |                  |           |  |
| 3                 | Fcm              | 21        | 3                | Bur_night        | 23        |  |
|                   | Heimk_drinking   | 8         |                  | Fcm              | 14        |  |
|                   | Homecage_feeding | 38        |                  | Heimk_drinking   | 25        |  |
|                   | Irwin            | 3         |                  | Homecage_feeding | 6         |  |
|                   | Nesting_sum      | 4         |                  | Irwin            | 6         |  |
|                   | OF_distance      | 5         |                  | Nesting_sum      | 1         |  |
|                   | OF_jumps         | 4         |                  | OF_jumps         | 4         |  |
|                   | OF_wall          | 4         |                  | OF_wall          | 13        |  |
| Temp              | 13               | Temp      | 8                |                  |           |  |
| 4                 | Fcm              | 7         | 4                | Bur_night        | 11        |  |
|                   | Heimk_drinking   | 10        |                  | Fcm              | 8         |  |
|                   | Homecage_feeding | 5         |                  | Heimk_drinking   | 23        |  |
|                   | Irwin            | 2         |                  | Homecage_feeding | 16        |  |
|                   | Nesting_sum      | 27        |                  | Irwin            | 3         |  |
|                   |                  |           | Nesting_sum      | 9                |           |  |
|                   |                  |           | OF_jumps         | 4                |           |  |
|                   |                  |           | OF_wall          | 18               |           |  |

**Table S9. Top 30 parameters after 100 PCA runs of the training set. Genetic models.**
