# Supplementary material for: Evidence-based comparative severity assessment in young and adult mice
Source: PubMed Central journal article supplement (PMC10588901; doi:10.1371/journal.pone.0285429), 2023-10-20
Supplement: pone.0285429.s021.pdf [file pone.0285429.s021.pdf]

| Group                         | Cluster | <i>Grial</i> model:<br>early adolescence |       | <i>Scn1a</i> model<br>early adolescence |       | <i>Grial</i> model<br>late adolescence |       | <i>Scn1a</i> model<br>late adolescence |       |
|-------------------------------|---------|------------------------------------------|-------|-----------------------------------------|-------|----------------------------------------|-------|----------------------------------------|-------|
|                               |         | n                                        | %     | n                                       | %     | n                                      | %     | n                                      | %     |
| <b>Wild-type</b>              | 4       | 31                                       | 1.95  | 119                                     | 7.51  | 42                                     | 2.64  | 26                                     | 1.64  |
|                               | 3       | 498                                      | 31.26 | 575                                     | 36.28 | 763                                    | 47.90 | 223                                    | 14.07 |
|                               | 2       | 666                                      | 41.81 | 521                                     | 32.87 | 782                                    | 49.09 | 520                                    | 32.81 |
|                               | 1       | 398                                      | 24.98 | 370                                     | 23.34 | 6                                      | 0.38  | 816                                    | 51.48 |
| <b>Genetic<br/>deficiency</b> | 4       | 85                                       | 5.92  | 566                                     | 35.69 | 60                                     | 4.18  | 662                                    | 41.74 |
|                               | 3       | 354                                      | 24.65 | 616                                     | 38.84 | 740                                    | 51.53 | 579                                    | 36.51 |
|                               | 2       | 542                                      | 37.74 | 321                                     | 20.24 | 574                                    | 39.97 | 320                                    | 20.18 |
|                               | 1       | 455                                      | 31.69 | 83                                      | 5.23  | 62                                     | 4.32  | 25                                     | 1.58  |

**Table S10. Results from the *k*-means cluster allocation in the genetic models.**
